# Supplementary material for: Molecular Basis of Class A β-Lactamase Inhibition by Relebactam
Source: PubMed Central journal article supplement (PMC6761529; doi:10.1128/aac.00564-19), 2019-09-23
Supplement: AAC.00564-19-s0001.pdf [file AAC.00564-19-s0001.pdf]

Supplemental information for:

**Molecular Basis of Class A  $\beta$ -lactamase Inhibition by Relebactam**

*Catherine L. Tooke<sup>1</sup>, Philip Hinchliffe<sup>1</sup>, Pauline A. Lang<sup>2</sup>, Adrian J. Mulholland<sup>3</sup>, Jürgen Brem<sup>2</sup>, Christopher J. Schofield<sup>2</sup>, and James Spencer<sup>1\*</sup>.*

<sup>1</sup>*School of Cellular and Molecular Medicine, Biomedical Sciences Building, University of Bristol, Bristol, BS8 1TD, United Kingdom.*

<sup>2</sup>*Department of Chemistry, University of Oxford, 12 Mansfield Road, Oxford, OX1 3TA, United Kingdom.*

<sup>3</sup>*Centre for Computational Chemistry, School of Chemistry, University of Bristol, Cantock's Close, BS8 1TS, Bristol, United Kingdom.*

\*Corresponding author: [Jim.Spencer@bristol.ac.uk](mailto:Jim.Spencer@bristol.ac.uk)

**Tables:**

Table S1. Primers for site-directed mutagenesis.

Table S2. Nitrocefin steady-state kinetic parameters.

Table S3. Crystallographic data collection and refinement statistics.

Table S4. RSCCs from PDB validation.

Table S5. RMSD changes in C<sub>α</sub> across crystal structures.

**Figures:**

Figure S1. Kinetic characterisation of relebactam inhibition of CTX-M-15.

Figure S2. Kinetic characterisation of relebactam inhibition of L2.

Figure S3. Kinetic characterisation of relebactam inhibition of KPC-3.

Figure S4. Kinetic characterisation of relebactam inhibition of KPC-4.

Figure S5. Views from crystal structures of wildtype KPC-3 and KPC-4.

Figure S6. Active site interactions of L2:relebactam and CTX-M-15:relebactam enzyme complexes.

Figure S7. Active site interactions of KPC-2:relebactam and KPC-3:relebactam enzyme complexes

Figure S8. Active site interactions of KPC-4:relebactam 1 h and 16 h complexes.

Figure S9. Unbiased omit  $F_o-F_c$  electron density for residues 104 and 105 in SBL:relebactam complexes.

Figure S10. Superpositions of DBO binding to class A  $\beta$ -lactamases.

Figure S11. pH influence on fragmentation of covalent avibactam and relebactam adducts.

**Table S1. Primers for site-directed mutagenesis.**

| <b>Primer name</b>  | <b>Sequence</b>                                |
|---------------------|------------------------------------------------|
| KPC-3 to KPC-2 FWD  | 5' CTAACAAGGATGACAAGCACAGCGAGGCCGTCATC 3'      |
| KPC-3 to KPC-2 REV  | 5' GATGACGGCCTCGCTGTGCTTGTCATCCTTGTTAG 3'      |
| KPC-2 to KPC4(1)FWD | 5' CAAAATGCGCTGGTTCGGTGGTCACCCATCTCG 3'        |
| KPC-2 to KPC4(1)REV | 5' CGAGATGGGTGACCACCGAACAGCGCATTTTTG 3'        |
| KPC-2 to KPC4(2)FWD | 5' AAAACCGGAACCTGCGGAGGGTATGGCACGGCAAATGAC 3'  |
| KPC-2 to KPC4(2)REV | 5' GTCATTTGCCGTGCCATACCCTCCGCAGGTTCCGGTTTTG 3' |

**Table S2. Nitrocefin steady-state kinetic parameters.**

| <b>Nitrocefin parameters</b> |                                      |                                  |                                                                       |
|------------------------------|--------------------------------------|----------------------------------|-----------------------------------------------------------------------|
|                              | $k_{\text{cat}}$ ( $\text{s}^{-1}$ ) | $K_{\text{M}}$ ( $\mu\text{M}$ ) | $k_{\text{cat}}/K_{\text{M}}$<br>( $\mu\text{M}^{-1} \text{s}^{-1}$ ) |
| <b>L2</b>                    | 813 (41)                             | 206 (27)                         | 4                                                                     |
| <b>CTX-M-15</b>              | 312 (8)                              | 63 (11)                          | 5                                                                     |
| <b>KPC-2</b>                 | 613 (9)                              | 18.3 (5)                         | 3                                                                     |
| <b>KPC-3</b>                 | 88 (8)                               | 36 (6)                           | 2                                                                     |
| <b>KPC-4</b>                 | 166 (44)                             | 59 (20)                          | 3                                                                     |

*Standard errors in parentheses, n = 3 calculated in GraphPad Prism.*

**Table S3. Crystallographic Data Collection and Refinement Statistics.**

|                                       | KPC-3 native                             | KPC-4 native                             | KPC-2:relebactam                         | KPC-3:relebactam                         | KPC-4 relebactam                         | KPC-4 relebactam (1hr)                   | CTX-M-15:relebactam                                   | L2:relebactam                                         |
|---------------------------------------|------------------------------------------|------------------------------------------|------------------------------------------|------------------------------------------|------------------------------------------|------------------------------------------|-------------------------------------------------------|-------------------------------------------------------|
| <b>Data collection:</b> Space group   | <i>P</i> 2 <sub>1</sub> 2 <sub>1</sub> 2 | <i>P</i> 2 <sub>1</sub> 2 <sub>1</sub> 2 | <i>P</i> 2 <sub>1</sub> 2 <sub>1</sub> 2 | <i>P</i> 2 <sub>1</sub> 2 <sub>1</sub> 2 | <i>P</i> 2 <sub>1</sub> 2 <sub>1</sub> 2 | <i>P</i> 2 <sub>1</sub> 2 <sub>1</sub> 2 | <i>P</i> 2 <sub>1</sub> 2 <sub>1</sub> 2 <sub>1</sub> | <i>P</i> 2 <sub>1</sub> 2 <sub>1</sub> 2 <sub>1</sub> |
| Molecules/ASU                         | 1                                        | 1                                        | 1                                        | 1                                        | 1                                        | 1                                        | 1                                                     | 2                                                     |
| <b>Cell dimensions:</b> a, b, c (Å)   | 60.01, 78.62, 56.01                      | 59.93, 78.74, 56.08                      | 59.93, 78.54, 55.84                      | 60.13, 78.72, 55.8                       | 60.00, 79.2, 56.00                       | 60.19, 78.98, 55.74                      | 44.69, 45.43, 117.75                                  | 69.95, 84.34, 94.14                                   |
| α, β, γ (°)                           | 90.0, 90.0, 90.0                         | 90.0, 90.0, 90.0                         | 90.0, 90.0, 90.0                         | 90.0, 90.0, 90.0                         | 90.0, 90.0, 90.0                         | 90.0, 90.0, 90.0                         | 90.0, 90.0, 90.0                                      | 90.0, 90.0, 90.0                                      |
| Wavelength(s) (Å)                     | 0.78                                     | 0.94                                     | 0.78                                     | 0.86                                     | 0.94                                     | 0.78                                     | 0.98                                                  | 0.98                                                  |
| <b>Resolution (Å)</b>                 | 32.88-1.20 (1.22-1.20)                   | 45.68- 1.40 (1.42-1.40)                  | 32.84- 1.04 (1.06-1.04)                  | 60.13-1.06 (1.08-1.06)                   | 47.81- 1.04 (1.06-1.04)                  | 40.90-1.30 (1.30-1.32)                   | 44.54-1.10 (1.12-1.10)                                | 62.82- 1.78 (1.82-1.78)                               |
| R <sub>sym</sub>                      | 0.033 (0.405)                            | 0.053 (0.720)                            | 0.032 (0.548)                            | 0.023 (0.327)                            | 0.027 (0.345)                            | 0.053 (0.931)                            | 0.029 (0.145)                                         | 0.074 (0.345)                                         |
| CC <sub>1/2</sub>                     | 0.999 (0.599)                            | 0.998 (0.767)                            | 0.999 (0.726)                            | 0.999 (0.833)                            | 0.999 (0.774)                            | 0.996 (0.684)                            | 0.999 (0.959)                                         | 0.993 (0.635)                                         |
| I / σ(I)                              | 10.8 (2.0)                               | 8.5 (1.6)                                | 10.5 (1.6)                               | 14.0 (2.3)                               | 12.7 (2.2)                               | 9.8 (1.6)                                | 19.3 (5.9)                                            | 7.8 (2.3)                                             |
| Completeness (%)                      | 100 (100)                                | 100 (100)                                | 100 (100)                                | 98.9 (97.2)                              | 99.4 (90.8)                              | 100 (100)                                | 99.7 (94.7)                                           | 100 (100)                                             |
| Redundancy                            | 12.7 (12.6)                              | 12.6 (12.4)                              | 12.7 (12.5)                              | 13.1 (13.2)                              | 12.1 (7.5)                               | 12.0 (12.1)                              | 11.9 (6.7)                                            | 12.7 (12.8)                                           |
| <b>Refinement</b>                     |                                          |                                          |                                          |                                          |                                          |                                          |                                                       |                                                       |
| Resolution (Å)                        | 32.18 -1.20                              | 45.68 - 1.40                             | 32.84- 1.04                              | 55.8-1.06                                | 45.712 - 1.04                            | 40.90-1.30                               | 42.50- 1.10                                           | 62.82-1.78                                            |
| No. reflections                       | 83425                                    | 52930                                    | 126,715                                  | 118,930                                  | 127, 468                                 | 75,907                                   | 97,874                                                | 54,128                                                |
| R <sub>work</sub> / R <sub>free</sub> | 0.1430 / 0.1579                          | 0.1453 / 0.1767                          | 0.1149 / 0.1338                          | 0.1223 / 0.1425                          | 0.1202 / 0.1341                          | 0.1575 / 0.1676                          | 0.1147 / 0.1313                                       | 0.1593 / 0.2050                                       |
| No. atoms                             |                                          |                                          |                                          |                                          |                                          |                                          |                                                       |                                                       |
| Protein                               | 4310                                     | 4135                                     | 4352                                     | 4228                                     | 4363                                     | 4321                                     | 4083                                                  | 8246                                                  |
| Solvent                               | 364                                      | 323                                      | 387                                      | 406                                      | 458                                      | 307                                      | 397                                                   | 632                                                   |
| Ligand                                | -                                        | -                                        | 80                                       | 80                                       | 80                                       | 43                                       | 86                                                    | 43                                                    |
| B-factors                             |                                          |                                          |                                          |                                          |                                          |                                          |                                                       |                                                       |
| Protein                               | 16.73                                    | 19.84                                    | 12.78                                    | 13.61                                    | 13.24                                    | 18.58                                    | 11.83                                                 | 19.33                                                 |
| Solvent                               | 32.79                                    | 35.11                                    | 33.13                                    | 32.0                                     | 30.01                                    | 32.67                                    | 26.08                                                 | 31.47                                                 |
| Ligand                                | -                                        | -                                        | 13.66                                    | 13.95                                    | 16.58                                    | 18.43                                    | 19.76                                                 | 34.19                                                 |
| R.m.s. deviations                     |                                          |                                          |                                          |                                          |                                          |                                          |                                                       |                                                       |
| Bond lengths (Å)                      | 0.007                                    | 0.007                                    | 0.011                                    | 0.011                                    | 0.012                                    | 0.008                                    | 0.014                                                 | 0.010                                                 |
| Bond angles (°)                       | 1.007                                    | 0.962                                    | 1.338                                    | 1.437                                    | 1.345                                    | 0.972                                    | 1.461                                                 | 1.070                                                 |
| Ramachandran (%)                      |                                          |                                          |                                          |                                          |                                          |                                          |                                                       |                                                       |
| Outliers                              | 0                                        | 0                                        | 0                                        | 0                                        | 0                                        | 0                                        | 0.39                                                  | 0                                                     |
| Favoured                              | 98.9                                     | 98.5                                     | 98.5                                     | 98.9                                     | 97.7                                     | 97.7                                     | 98.1                                                  | 96. 6                                                 |
| PDB ID                                | 6QWD                                     | 6QWE                                     | 6QW9                                     | 6QWA                                     | 6QWB                                     | 6QWC                                     | 6QW8                                                  | 6QW7                                                  |

\*Values in parentheses are for highest-resolution shell.

**Table S4. Relebactam Real-Space Correlation Coefficients (RSCCs) from PDB Validation.**

|                          | <b>RSCC relebactam</b> | <b>RSCC imine</b> |
|--------------------------|------------------------|-------------------|
| KPC-2:relebactam         | 0.99                   | 0.98              |
| KPC-3:relebactam         | 0.98                   | 0.97              |
| KPC-4:relebactam (1hr)   | 0.97                   | -                 |
| KPC-4:relebactam (16 hr) | 0.99                   | 0.99              |
| L2:relebactam            | 0.93                   | -                 |
| CTX-M-15:relebactam      | 0.96                   | -                 |

**Table S5. RMSD changes in C<sub>α</sub> across crystal structures.**

| Reference structure         | Moving structure         | RMSD (Å) | Number of atoms |
|-----------------------------|--------------------------|----------|-----------------|
| Native KPC-2 (PDB: 5UL8)    | KPC-3                    | 0.099    | 268             |
|                             | KPC-4                    | 0.097    | 268             |
|                             | KPC-2:relebactam         | 0.126    | 268             |
| Native KPC-3                | KPC-3:relebactam         | 0.127    | 268             |
| Native KPC-4                | KPC-4:relebactam (1hr)   | 0.150    | 268             |
| Native KPC-4                | KPC-4:relebactam (16 hr) | 0.138    | 268             |
| Native L2 (PDB: 5NE2)       | L2:relebactam            | 0.142    | 270             |
| Native CTX-M-15 (PDB: 4HBT) | CTX-M-15:relebactam      | 0.263    | 261             |



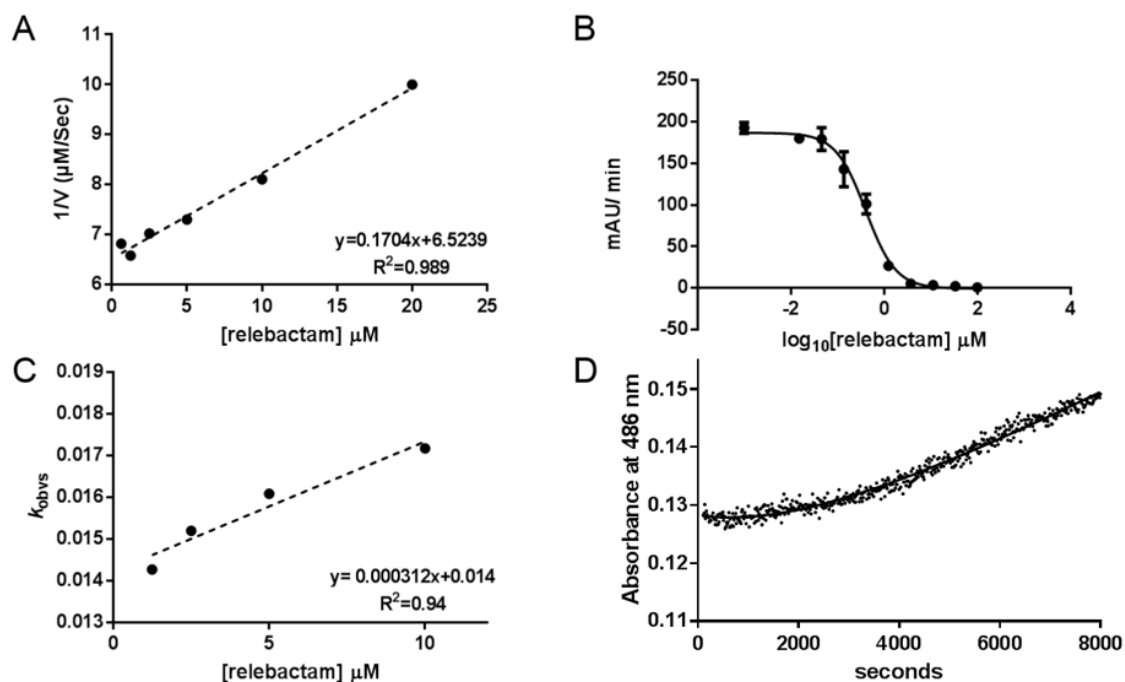

**Figure S1. Kinetic Characterization of Relebactam Inhibition of CTX-M-15.** (A) Dixon plot of reciprocals of initial nitrocefins hydrolysis rates ( $1/V$ ) by enzyme:relebactam mixtures plotted against Relebactam concentration. The apparent inhibition constant  $K_{i\text{app}}$  is obtained from the slope of the fitted straight line. (B) Initial rates of nitrocefins hydrolysis (absorbance units/min) after 10-minute incubation with Relebactam, plotted against  $\log_{10}[\text{relebactam}]$ . Fitted curve is used to derive  $\text{IC}_{50}$  according to Equation 1. (C) Plot of  $k_{\text{obs}}$  (pseudo-first-order rate constant for inactivation) against Relebactam concentration. The apparent second-order rate constant for the onset of carbamylation  $k_2/K$  is obtained from the slope of the fitted straight line. (D) Progress curve representing recovery of nitrocefins hydrolysis following 10 minute pre-incubation of enzyme ( $1 \mu\text{M}$ ) with  $17.5 \mu\text{M}$  Relebactam, diluted to a final concentration of  $50 \text{ pM}$  enzyme. The rate of recovery of free enzyme,  $k_{\text{off}}$ , is obtained from the fitted line shown according to Equation 6.

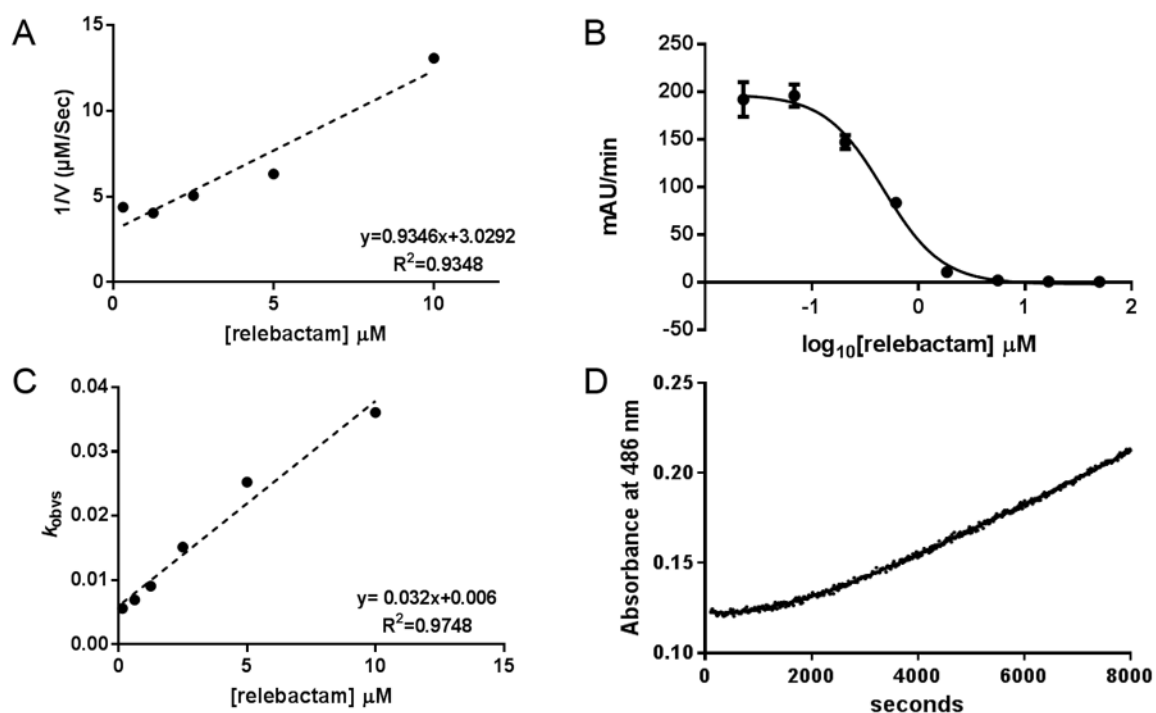

**Figure S2. Kinetic Characterization of Relebactam Inhibition of L2.** (A) Dixon plot of reciprocals of initial nitrocefin hydrolysis rates ( $1/V$ ) by enzyme:relebactam mixtures plotted against relebactam concentration. The apparent inhibition constant  $K_{i\text{app}}$  is obtained from the slope of the fitted straight line. (B) Initial rates of nitrocefin hydrolysis (absorbance units/min) after 10-minute incubation with relebactam, plotted against  $\log_{10}[\text{relebactam}]$ . Fitted curve is used to derive  $\text{IC}_{50}$  according to Equation 1. (C) Plot of  $k_{\text{obs}}$  (pseudo-first-order rate constant for inactivation) against relebactam concentration. The apparent second-order rate constant for the onset of carbamylation  $k_2/K$  is obtained from the slope of the fitted straight line. (D) Progress curve representing recovery of nitrocefin hydrolysis following 10 minute pre-incubation of enzyme ( $1 \mu\text{M}$ ) with  $17.5 \mu\text{M}$  relebactam, diluted to a final concentration of  $50 \text{ pM}$  enzyme. The rate of recovery of free enzyme,  $k_{\text{off}}$ , is obtained from the fitted line shown according to Equation 6.

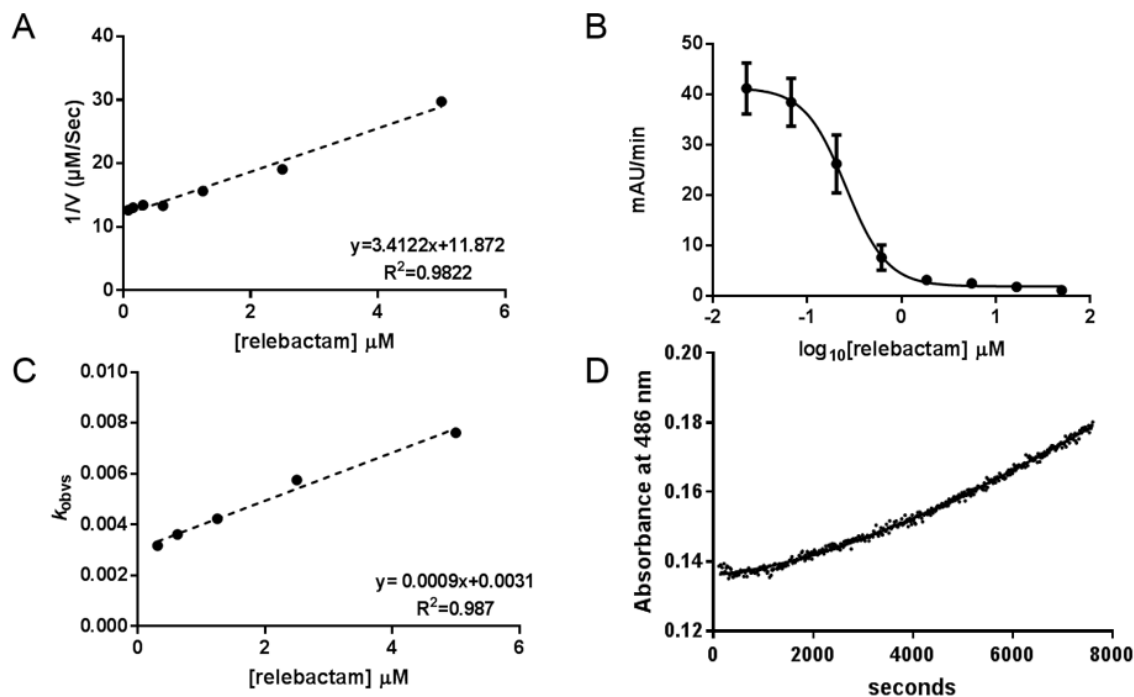

**Figure S3. Kinetic Characterization of Relebactam Inhibition of KPC-3.** (A) Dixon plot of reciprocals of initial nitrocefine hydrolysis rates ( $1/V$ ) by enzyme:relebactam mixtures plotted against relebactam concentration. The apparent inhibition constant  $K_{i\text{app}}$  is obtained from the slope of the fitted straight line. (B) Initial rates of nitrocefine hydrolysis (absorbance units/min) after 10-minute incubation with relebactam, plotted against  $\log_{10} [\text{relebactam}]$ . Fitted curve is used to derive  $\text{IC}_{50}$  according to Equation 1. (C) Plot of  $k_{\text{obs}}$  (pseudo-first-order rate constant for inactivation) against relebactam concentration. The apparent second-order rate constant for the onset of carbamylation  $k_2/K$  is obtained from the slope of the fitted straight line. (D) Progress curve representing recovery of nitrocefine hydrolysis following 10 minute pre-incubation of enzyme (1  $\mu\text{M}$ ) with 17.5  $\mu\text{M}$  relebactam, diluted to a final concentration of 5 nM enzyme. The rate of recovery of free enzyme,  $k_{\text{off}}$ , is obtained from the fitted line shown according to Equation 6.

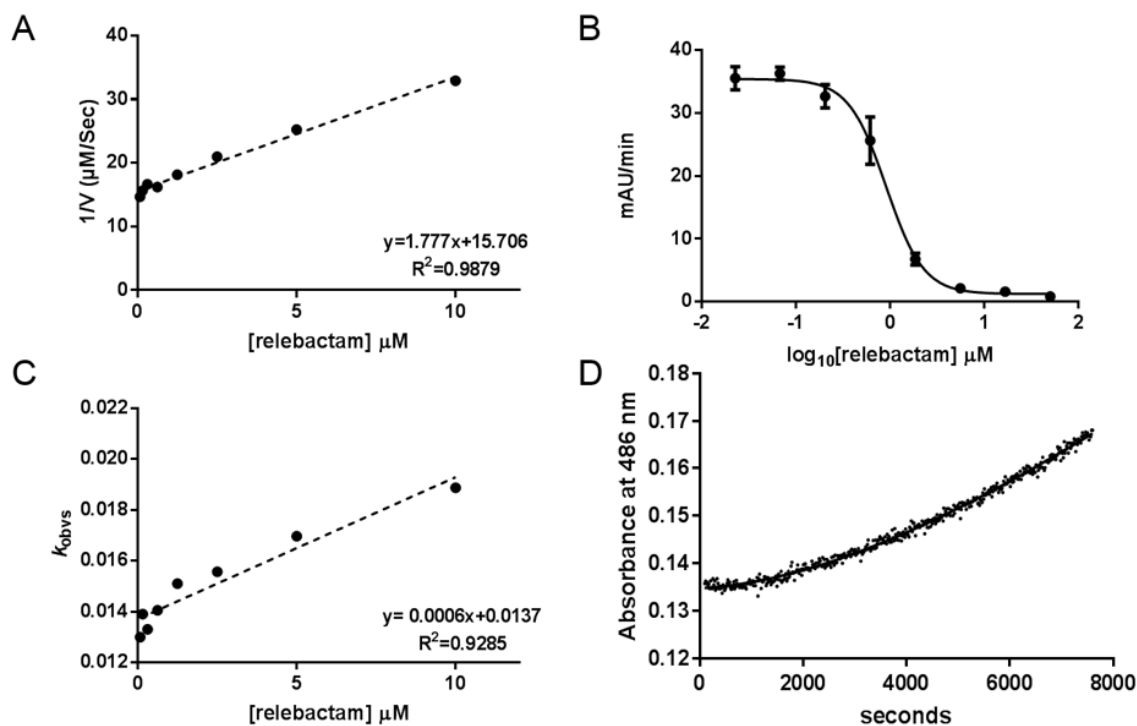

**Figure S4. Kinetic characterisation of relebactam inhibition of KPC-4.** (A) Dixon plot of reciprocals of initial nitrocefin hydrolysis rates ( $1/V$ ) by enzyme:relebactam mixtures plotted against relebactam concentration. The apparent inhibition constant  $K_{i\text{app}}$  is obtained from the slope of the fitted straight line. (B) Initial rates of nitrocefin hydrolysis (absorbance units/min) after 10-minute incubation with relebactam, plotted against  $\log_{10}$  [relebactam]. Fitted curve is used to derive  $\text{IC}_{50}$  according to Equation 1. (C) Plot of  $k_{\text{obs}}$  (pseudo-first-order rate constant for inactivation) against relebactam concentration. The apparent second-order rate constant for the onset of carbamylation  $k_2/K$  is obtained from the slope of the fitted straight line. (D) Progress curve representing recovery of nitrocefin hydrolysis following 10 minute pre-incubation of enzyme (1  $\mu\text{M}$ ) with 17.5  $\mu\text{M}$  relebactam, diluted to a final concentration of 50 nM enzyme. The rate of recovery of free enzyme,  $k_{\text{off}}$ , is obtained from the fitted line shown according to Equation 6.

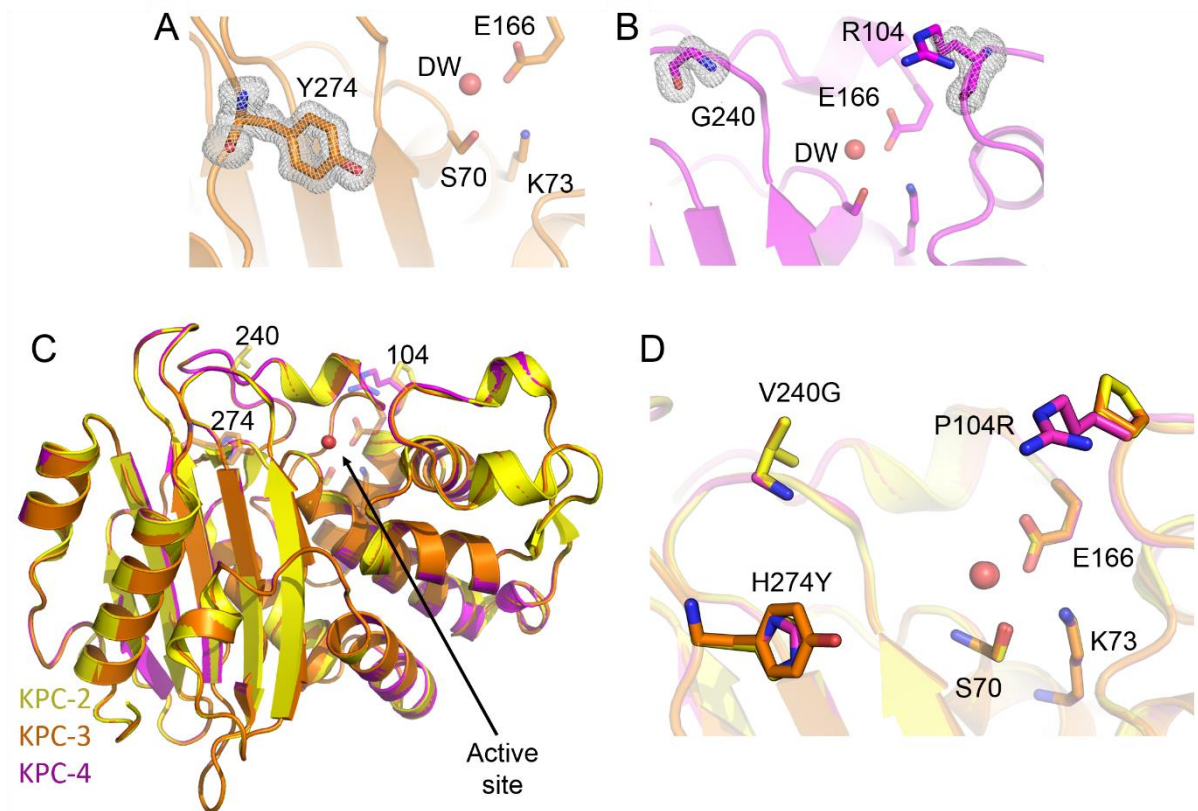

**Figure S5. Views from crystal structures of wildtype KPC-3 and KPC-4.** (A) Zoom in of the KPC-3 active site with unbiased omit  $F_o-F_c$  electron density for Tyr274. (B) Zoom in of the KPC-4 active site with unbiased omit  $F_o-F_c$  electron density for Gly240 and Arg104. (C) Superposition of native KPC-2 (PDB 5UL8) in yellow, KPC-3 in orange and KPC-4 in pink, variant positions are identified as sticks and labelled. (D) Close-up view of the active site in panel C. Key active site residues and variant positions shown as sticks and the ‘deacylating’ water (DW) represented as red spheres.

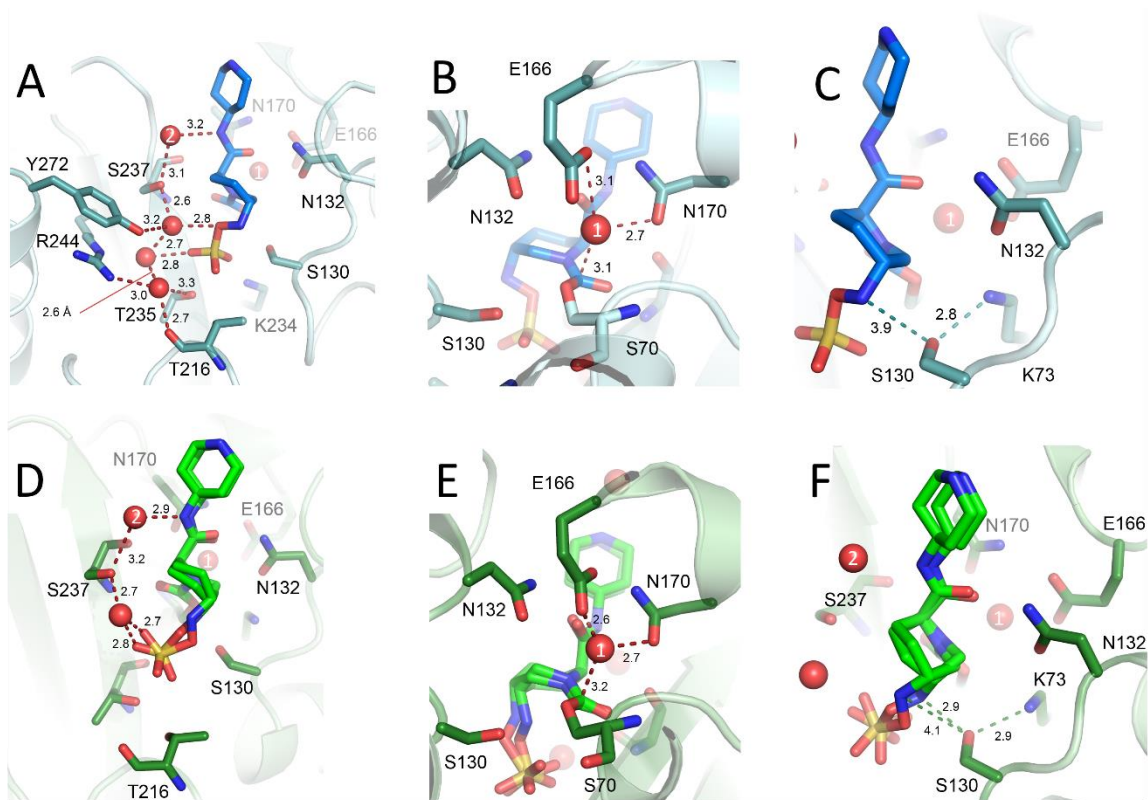

**Figure S6. Active site interactions of L2:relebactam and CTX-M-15:relebactam acylenzymes.** (A, B and C) L2, in teal, complexed with relebactam (blue). (D, E and F) CTX-M-15, in forest, complexed with relebactam (green). Relebactam and key active site residues represented as sticks, hydrogen bonding interactions with protein are shown as backbone colour. Waters are shown as red spheres and waters conserved in relebactam complexes across the five enzymes are numbered. Distances with waters are represented with red dashes in Å.

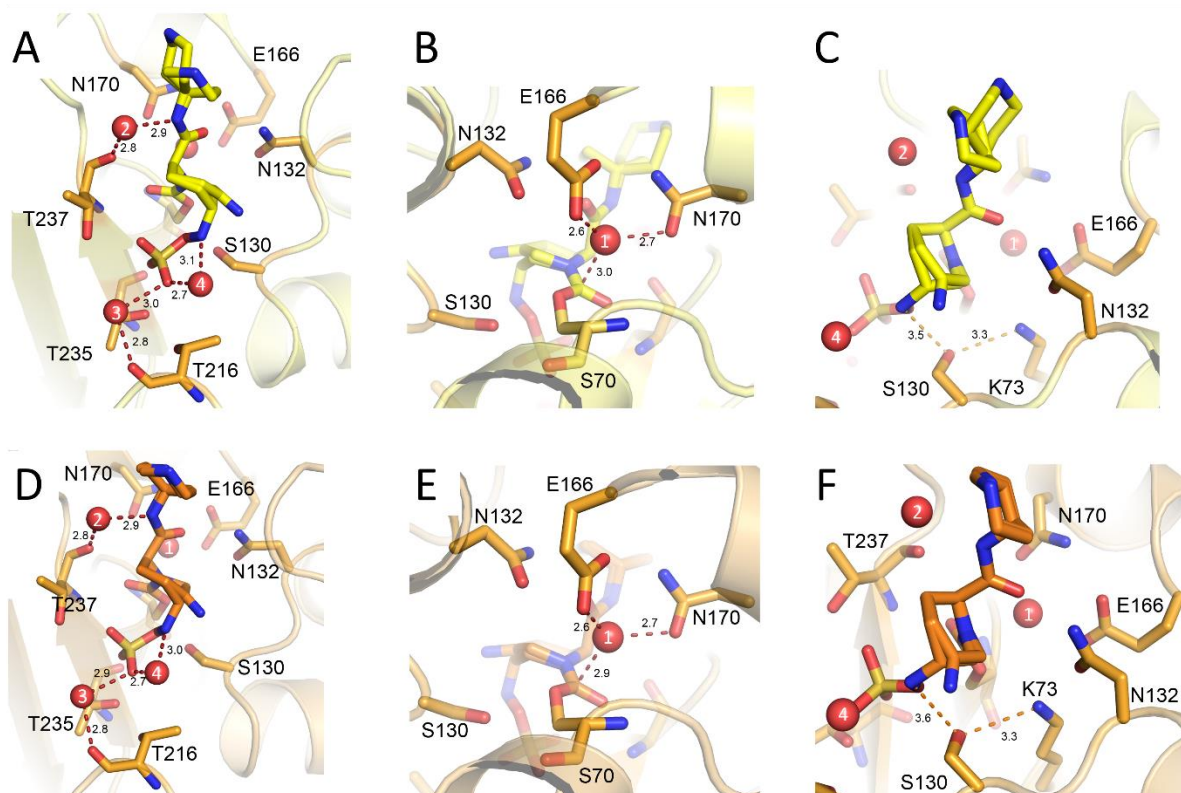

**Figure S7. Active site interactions of KPC-2:relebactam and KPC-3:relebactam enzyme complexes.** (A, B and C) KPC-2, light yellow, complexed with relebactam (bright yellow). (D, E and F) KPC-3, light orange, complexed with relebactam (orange). Relebactam and key active site residues represented as sticks, hydrogen bonding interactions with protein are shown as backbone colour. Waters, shown as red spheres, are numbered. Distances with waters are represented with red dashes in Å.

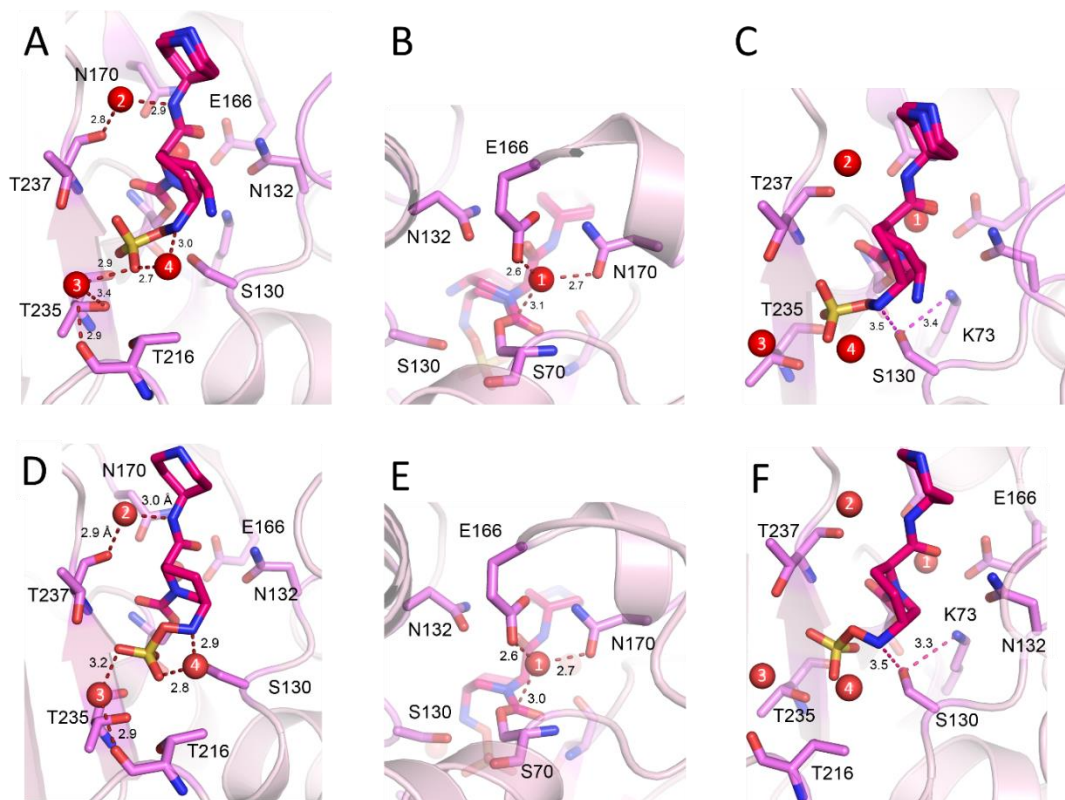

**Figure S8. Active site interactions of KPC-4:relebactam 1 h and 16 h complexes.** (A, B and C) KPC-4 (16-hour soak), complexed with relebactam (hot pink). (D, E and F) KPC-4 (1-hour soak), complexed with relebactam (hot pink). Relebactam and key active site residues represented as sticks, hydrogen bonding interactions with protein are shown as backbone colour. Waters, shown as red spheres, are numbered. Distances with waters are represented with red dashes in Å.



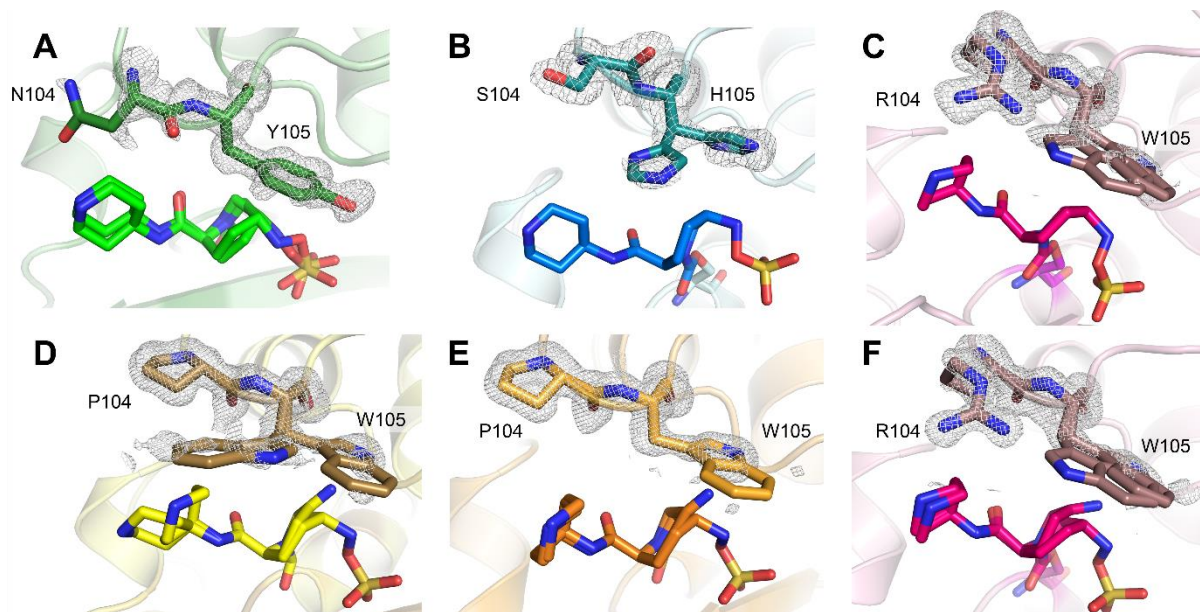

**Figure S9.** Unbiased omit  $F_o-F_c$  electron density for residues 104 and 105 in the SBL:relebactam complexes. (A) CTX-M-15 (green); (B) L2 (blue); (C) KPC-4 1-hour relebactam soak (pink); (D) KPC-2 (yellow); (E) KPC-3 (orange) and (F) KPC-4 16-hour relebactam soak (pink).

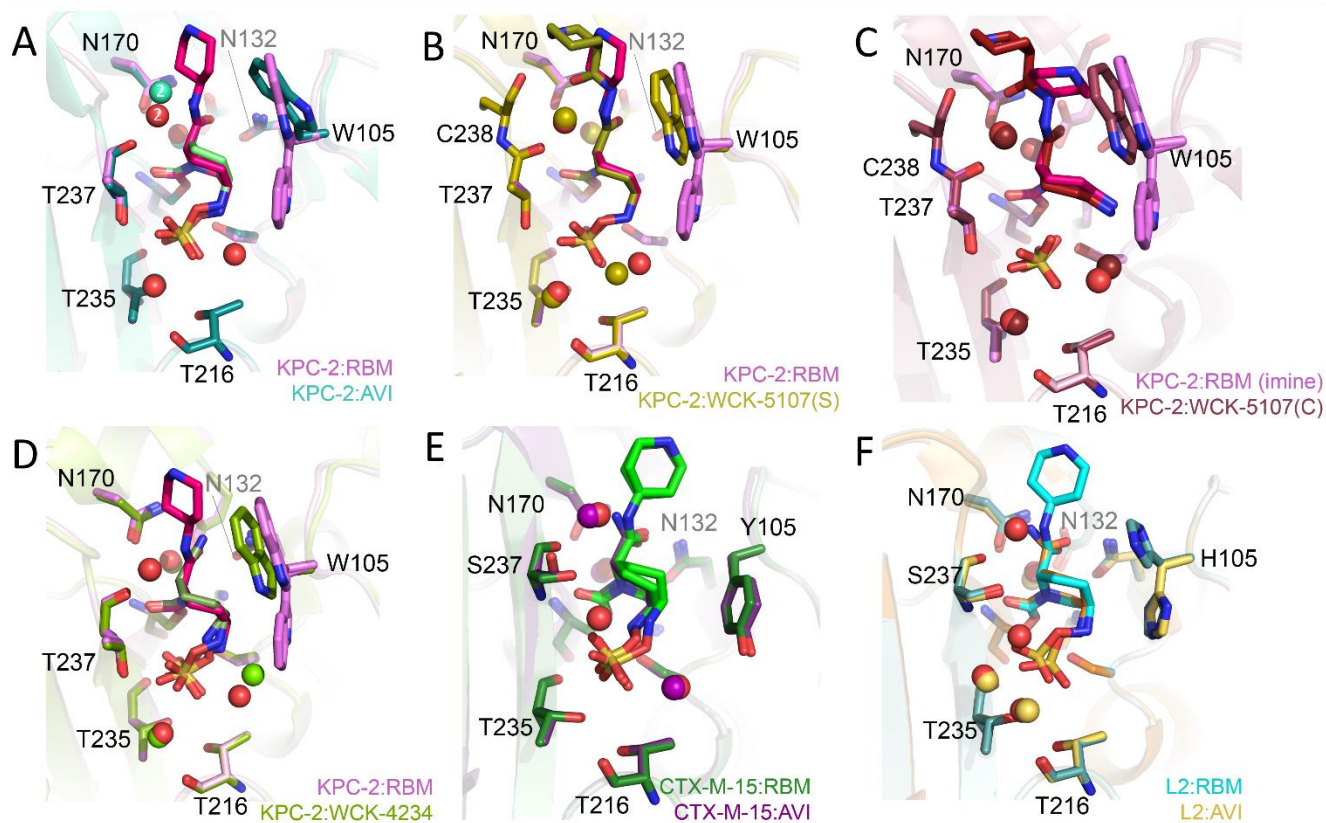

**Figure S10. Superpositions of DBO binding to class A  $\beta$ -lactamases.** (A) Avibactam (teal) overlaid with relebactam (pink) in KPC-2. (B) WCK-5107 ('intact', gold) soaked in to KPC-2 crystals (16 hours) overlaid with relebactam in KPC-2 (pink). (C) Co-crystal structure of the desulfated form of WCK-5107 (brown) superposed with the desulfated imine form of relebactam observed in KPC-2 (pink). (D) WCK-4234 (green) superposed with relebactam (pink) in KPC-2. (E) Both conformations of relebactam (green) superposed with avibactam (purple) bound in CTX-M-15. (F) Comparison of relebactam (cyan) and avibactam (yellow) binding in L2.

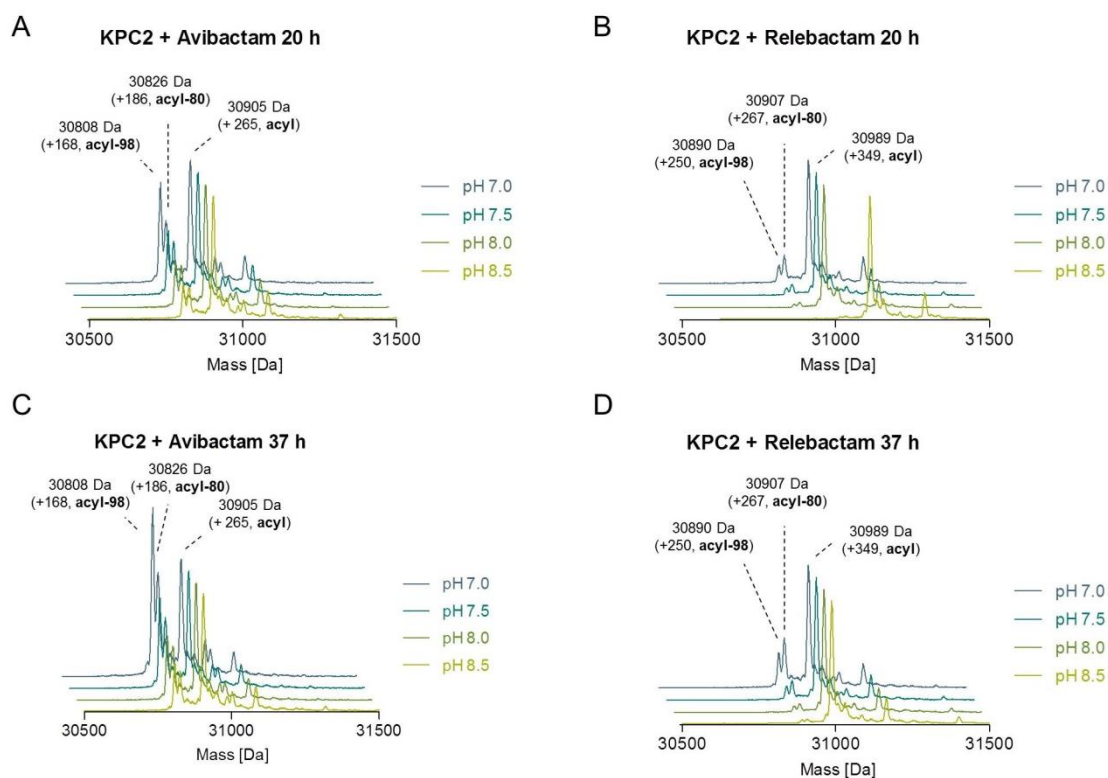

**Figure S11: pH influence on fragmentation of covalent avibactam and relebactam adducts.** Samples were incubated at room temperature for the indicated time in 50 mM Tris-HCl buffered to the indicated pH. The ‘acyl’, ‘acyl’ -80 (hydroxylamine) and ‘acyl’ -98 (imine) species are displayed in **Figure 5A**. (A) KPC-2 incubated with avibactam (20 hrs); (B) KPC-2 incubated with relebactam (20 hrs); (C) KPC-2 incubated with avibactam (37 hrs); (D) KPC-2 incubated with relebactam (37 hrs).
